# Supplementary material
Source: publisher figshare collection journal article supplement (https://tandf.figshare.com/ndownloader/files/13597571)
Supplement: Supplementary file 1 [file 13597571]

**Supporting Information**

A hydroxyquinoline-appended ruthenium(II)-polypyridyl complex that induces and stabilizes G-quadruplex DNA

XUEXUE XU, SHUANG WANG, YAXUAN MI, HUAQIAN ZHAO, ZEBAO ZHENG* and XIAOLONG ZHAO*

Figure S1. 1H NMR spectra of the ligand.

Figure S2. 1H NMR spectra of the ruthenium complex.

Figure S3. 13C NMR spectra of the ruthenium complex.


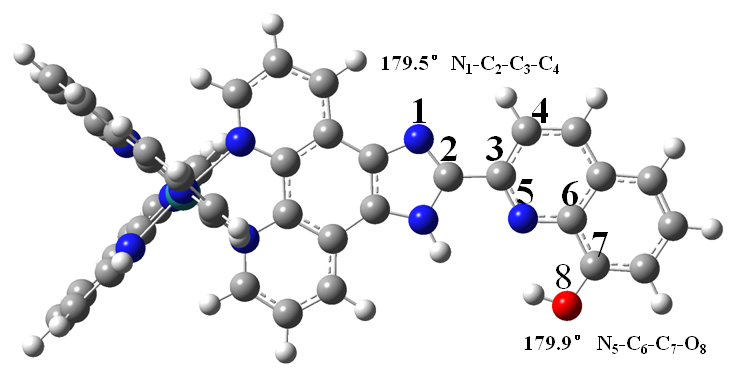


Figure S4. The optimized structure of the ruthenium complex.
